# Supplementary material for: Human Milk Concentrations of Minerals, Essential and Toxic Trace Elements and Association with Selective Medical, Social, Demographic and Environmental Factors
Source: MDPI journal article supplement (doi:10.3390/nu13061885), 2021-05-31
Supplement: s1 [file s1]

**Supplementary Table 3:** Concentrations of trace elements detected in infant milk formula: comparison with range recommended by ESPGHAN<sup>1</sup>

| Element                         | Type milk | ESPGHAN limit range | Interval (95%) |        | Lower range (%) | Upper range (%) | p-value | Element | ESPGHAN limit range | Interval (95%) |        | Lower range (%) | Upper range (%) | p-value |
|---------------------------------|-----------|---------------------|----------------|--------|-----------------|-----------------|---------|---------|---------------------|----------------|--------|-----------------|-----------------|---------|
|                                 |           |                     | Lower          | Upper  |                 |                 |         |         |                     | Lower          | Upper  |                 |                 |         |
| Minerals (mg/L)                 |           |                     |                |        |                 |                 |         |         |                     |                |        |                 |                 |         |
| Ca                              | SF        | 350–1050            | 345.14         | 494.72 | 10              | 0               | >0.999  | Na      | 130–390             | 131.72         | 162.40 | 40              | 0               | >0.999  |
|                                 | CF        |                     | 391.96         | 443.28 | 0               | 0               |         |         |                     | 150.49         | 171.75 | 20              | 0               |         |
|                                 | HF        |                     | 322.49         | 537.90 | 10              | 0               |         |         |                     | 113.57         | 267.72 | 10              | 0               |         |
|                                 | PF        |                     | 393            | 626    | 0               | 0               |         |         |                     | 180            | 257    | 0               | 0               |         |
| K                               | SF        | 390–1100            | 448.92         | 497.21 | 20              | 0               | >0.999  | P       | 160–575             | 253.67         | 281.59 | 0               | 0               | >0.999  |
|                                 | CF        |                     | 436.12         | 451.62 | 30              | 0               |         |         |                     | 261.15         | 288.77 | 0               | 0               |         |
|                                 | HF        |                     | 404.43         | 641.16 | 20              | 0               |         |         |                     | 235.32         | 367    | 0               | 0               |         |
|                                 | PF        |                     | 432.28         | 662.71 | 0               | 0               |         |         |                     | 271            | 381.59 | 0               | 0               |         |
| Mg                              | SF        | 35–110              | 46.46          | 54.46  | 0               | 0               | >0.999  |         |                     |                |        |                 |                 |         |
|                                 | CF        |                     | 40.36          | 65.88  | 0               | 0               |         |         |                     |                |        |                 |                 |         |
|                                 | HF        |                     | 43.64          | 75.95  | 0               | 0               |         |         |                     |                |        |                 |                 |         |
|                                 | PF        |                     | 62             | 73     | 0               | 0               |         |         |                     |                |        |                 |                 |         |
| Essential trace elements (µg/L) |           |                     |                |        |                 |                 |         |         |                     |                |        |                 |                 |         |
| Co                              | SF        | 0–2                 | 0.17           | 0.33   | 0               | 0               | >0.999  | Mn      | 7–325               | 53.58          | 133.11 | 0               | 0               | >0.999  |
|                                 | CF        |                     | 0.16           | 0.34   | 0               | 0               |         |         |                     | 34.27          | 80.43  | 0               | 0               |         |
|                                 | HF        |                     | 0.02           | 0.19   | 0               | 0               |         |         |                     | 37.9           | 341.22 | 0               | 10              |         |
|                                 | PF        |                     | 0.34           | 1.08   | 0               | 0               |         |         |                     | 31.37          | 79.02  | 0               | 0               |         |
| Cu                              | SF        | 225–520             | 337.25         | 428.81 | 0               | 0               | >0.999  | Se      | 660                 | 15.95          | 21.21  | 0               | 0               | >0.999  |
|                                 | CF        |                     | 297.81         | 403.68 | 0               | 0               |         |         |                     | 14.29          | 20.63  | 0               | 0               |         |
|                                 | HF        |                     | 314.82         | 479.84 | 0               | 0               |         |         |                     | 16.10          | 25.94  | 0               | 0               |         |
|                                 | PF        |                     | 206.96         | 634.91 | 0               | 0               |         |         |                     | 17.31          | 22.18  | 0               | 0               |         |

|    |    |            |         |         |   |   |        |    |                 |         |         |    |   |       |
|----|----|------------|---------|---------|---|---|--------|----|-----------------|---------|---------|----|---|-------|
| Fe | SF | 2000–10000 | 5369.12 | 6769.54 | 0 | 0 | >0.999 | Zn | 3500 –<br>11000 | 4155.71 | 5139.35 | 10 | 0 | 0.872 |
|    | CF |            | 8505.13 | 9346.36 | 0 | 0 |        |    |                 | 4015.30 | 5805.44 | 0  | 0 |       |
|    | HF |            | 4939.29 | 9621.10 | 0 | 0 |        |    |                 | 2970.98 | 7120.61 | 20 | 0 |       |
|    | PF |            | 2793.26 | 9814.03 | 0 | 0 |        |    |                 | 6179    | 7237    | 0  | 0 |       |
| I  | SF | 65–325     | 114.05  | 152.00  | 0 | 0 | >0.999 |    |                 |         |         |    |   |       |
|    | CF |            | 141.07  | 171.05  | 0 | 0 |        |    |                 |         |         |    |   |       |
|    | HF |            | 131.96  | 148.17  | 0 | 0 |        |    |                 |         |         |    |   |       |
|    | PF |            | 149.24  | 177.28  | 0 | 0 |        |    |                 |         |         |    |   |       |

Abbreviations: Ca, calcium; CF, continuation formula; Co, cobalt; Cu, copper; ESPGHAN, European Society of Pediatric Gastroenterology and Nutrition; Fe, iron; HF, hydrolyzed formula; I, iodine; K, potassium; Mg, magnesium; Mn, manganese; Na, sodium; P, phosphorus; PF, preterm formula; Se, selenium; SF, starter formula; Zn, zinc.

1. Hojsak I, Bronsky J, Campoy C et al; ESPGHAN Committee on Nutrition. Young Child Formula: A Position Paper by the ESPGHAN Committee on Nutrition. *J Pediatr Gastroenterol Nutr.* 2018; 66(1):177-185.
