# Supplementary material for: Human Milk Concentrations of Minerals, Essential and Toxic Trace Elements and Association with Selective Medical, Social, Demographic and Environmental Factors
Source: MDPI journal article supplement (doi:10.3390/nu13061885), 2021-05-31
Supplement: s1 [file s1]

| Element                         | Type milk | Manufacturer range | Interval (95%) |         | Lower range (%) | Upper range (%) | p-value | Element | Manufacturer range | Interval (95%) |         | Lower range (%) | Upper range (%) | p-value |
|---------------------------------|-----------|--------------------|----------------|---------|-----------------|-----------------|---------|---------|--------------------|----------------|---------|-----------------|-----------------|---------|
|                                 |           |                    | Lower          | Upper   |                 |                 |         |         |                    | Lower          | Upper   |                 |                 |         |
| Minerals (mg/L)                 |           |                    |                |         |                 |                 |         |         |                    |                |         |                 |                 |         |
| Ca                              | SF        | 338–585            | 345.14         | 494.72  | 0               | 0               | >0.999  | Na      | 120–184            | 131.72         | 162.40  | 0               | 0               | >0.999  |
|                                 | CF        | 405–650            | 391.96         | 443.28  | 0               | 0               |         |         | 159–184            | 150.49         | 171.75  | 0               | 0               |         |
|                                 | HF        | 400–620            | 322.49         | 537.90  | 0               | 0               |         |         | 180–230            | 113.57         | 267.72  | 0               | 0               |         |
|                                 | PF        | 500–620            | 393            | 626     | 0               | 0               |         |         | 215–254            | 180            | 257     | 0               | 10              |         |
| K                               | SF        | 440–569            | 448.92         | 497.21  | 0               | 0               | >0.999  | P       | 200–369            | 253.67         | 281.59  | 0               | 0               | >0.999  |
|                                 | CF        | 440–554            | 436.12         | 451.62  | 0               | 0               |         |         | 243–327            | 261.15         | 288.77  | 0               | 0               |         |
|                                 | HF        | 440–570            | 404.43         | 641.16  | 0               | 0               |         |         | 230–341            | 235.32         | 367     | 0               | 20              |         |
|                                 | PF        | 500–590            | 432.28         | 662.71  | 0               | 0               |         |         | 300–365            | 271            | 381.59  | 0               | 20              |         |
| Mg                              | SF        | 31–51              | 46.46          | 54.46   | 0               | 20              | >0.999  |         |                    |                |         |                 |                 |         |
|                                 | CF        | 33–60              | 40.36          | 65.88   | 0               | 30              |         |         |                    |                |         |                 |                 |         |
|                                 | HF        | 40–60              | 43.64          | 75.95   | 0               | 20              |         |         |                    |                |         |                 |                 |         |
|                                 | PF        | 40–70              | 62             | 73      | 0               | 10              |         |         |                    |                |         |                 |                 |         |
| Essential trace elements (µg/L) |           |                    |                |         |                 |                 |         |         |                    |                |         |                 |                 |         |
| Cu                              | SF        | 300–404            | 337.25         | 428.81  | 0               | 20              | 0.823   | Se      | 11–21              | 15.95          | 21.21   | 0               | 10              | >0.999  |
|                                 | CF        | 300–400            | 297.81         | 403.68  | 0               | 10              |         |         | 11–24              | 14.29          | 20.63   | 0               | 0               |         |
|                                 | HF        | 305–410            | 314.82         | 479.84  | 0               | 30              |         |         | 7–21               | 16.10          | 25.94   | 0               | 20              |         |
|                                 | PF        | 400–485            | 206.96         | 634.91  | 0               | 40              |         |         | 7–18               | 17.31          | 22.18   | 0               | 40              |         |
| Fe                              | SF        | 3000–6200          | 5369.12        | 6769.54 | 0               | 10              | >0.999  | Zn      | 3100–7300          | 4155.71        | 5139.35 | 0               | 0               | >0.999  |
|                                 | CF        | 7000–10000         | 8505.13        | 9346.36 | 0               | 0               |         |         | 3500–8000          | 4015.30        | 5805.44 | 0               | 0               |         |
|                                 | HF        | 3500–10000         | 4939.29        | 9621.10 | 0               | 0               |         |         | 3400–7600          | 2970.98        | 7120.61 | 0               | 0               |         |
|                                 | PF        | 5300–7000          | 2793.26        | 9814.03 | 0               | 40              |         |         | 4000–8800          | 6179           | 7237    | 0               | 0               |         |
| I                               | SF        | 89–160             | 114.05         | 152.00  | 0               | 0               | >0.999  |         |                    |                |         |                 |                 |         |
|                                 | CF        | 115–166            | 141.07         | 171.05  | 0               | 20              |         |         |                    |                |         |                 |                 |         |
|                                 | HF        | 89–145             | 131.96         | 148.17  | 0               | 20              |         |         |                    |                |         |                 |                 |         |

|    |        |        |        |   |   |
|----|--------|--------|--------|---|---|
| PF | 89–180 | 149.24 | 177.28 | 0 | 0 |
|----|--------|--------|--------|---|---|

Abbreviations: *Ca*, calcium; *CF*, continuation formula; *Cu*, copper; *Fe*, iron; *HF*, hydrolyzed formula; *I*, iodine; *K*, potassium; *Na*, sodium; *NS*, not significant; *P*, phosphorus; *PF*, preterm formula; *Se*, selenium; *SF*, starter formula; *Zn*, zinc.
