# Supplementary material for: Human Milk Concentrations of Minerals, Essential and Toxic Trace Elements and Association with Selective Medical, Social, Demographic and Environmental Factors
Source: MDPI journal article supplement (doi:10.3390/nu13061885), 2021-05-31
Supplement: s1 [file s1]

**Supplementary Table 1:** Configuration ICP-MS and ICP-OES spectrometers.

Abbreviations: Ag, silver; Al, aluminum; As, arsenic; Ba, barium; Be, beryllium; Ca, calcium; Cd, cadmium; Co, cobalt; Cr, chromium; Cs, cesium; Cu, copper; Fe, iron; Ga, gallium; Hg, mercury; I, iodine; ICP-MS, inductively coupled plasma mass spectrometry; ICP-

| Component / Parameter | ICP-MS                                                                                                                                                                                                                                                                                                                       | ICP-OES           |
|-----------------------|------------------------------------------------------------------------------------------------------------------------------------------------------------------------------------------------------------------------------------------------------------------------------------------------------------------------------|-------------------|
| Nebulizer             | Meihard                                                                                                                                                                                                                                                                                                                      | GemTip Flow Cross |
| Plasma gas flow       | 16.0 L/min                                                                                                                                                                                                                                                                                                                   | 16.0 L/min        |
| Auxiliary gas flow    | 1.2 L/min                                                                                                                                                                                                                                                                                                                    | 0.5 L/min         |
| Fog Rate              | 0.90 L/min                                                                                                                                                                                                                                                                                                                   | 0.80 L/min        |
| Sample Rate           | 400 µL/min                                                                                                                                                                                                                                                                                                                   | 1.5 mL/min        |
| Radio frequency power | 1600 W                                                                                                                                                                                                                                                                                                                       | 1600 W            |
| Integration time      | 500 ms                                                                                                                                                                                                                                                                                                                       | 5 s               |
| Replicas per sample   | 3                                                                                                                                                                                                                                                                                                                            | 5                 |
| Working mode          | KED (Kinetic Energy Discrimination) 1<br>or 4 mL/min He                                                                                                                                                                                                                                                                      |                   |
| Isotopes              |                                                                                                                                                                                                                                                                                                                              | Ca 317.93 nm      |
|                       | <sup>7</sup> Li, <sup>9</sup> Be, <sup>55</sup> Mn, <sup>63</sup> Cu, <sup>71</sup> Ga, <sup>85</sup> Rb, <sup>88</sup> Sr,<br><sup>98</sup> Mo, <sup>107</sup> Ag, <sup>111</sup> Cd, <sup>133</sup> Cs, <sup>138</sup> Ba, <sup>195</sup> Pt, <sup>202</sup> Hg,<br><sup>205</sup> Tl, <sup>208</sup> Pb, <sup>238</sup> U | K 766.48 nm       |
|                       | <sup>27</sup> Al, <sup>47</sup> Ti, <sup>51</sup> V, <sup>53</sup> Cr, <sup>57</sup> Fe, <sup>59</sup> Co, <sup>60</sup> Ni, <sup>66</sup> Zn,<br><sup>75</sup> As, <sup>78</sup> Se, <sup>118</sup> Sn, <sup>121</sup> Sb, <sup>127</sup> I                                                                                 | Mg 285.21 nm      |
|                       |                                                                                                                                                                                                                                                                                                                              | Na 589.584 nm     |
|                       |                                                                                                                                                                                                                                                                                                                              | P 213.62 nm       |

OES, inductively coupled plasma optical emission spectrometry; K, potassium; Li, lithium; Mg, magnesium; Mn, manganese; Mo, molybdenum; Na, sodium; Ni, nickel; P, phosphorus; Pb, lead; Pt, platinum; Rb, rubidium; Sb, antimony; Se, selenium; Sn, tin; Sr, strontium; Ti, titanium; Tl, thallium; U, uranium; V, vanadium; Zn, zinc.
