# Supplementary material for: Human Milk Concentrations of Minerals, Essential and Toxic Trace Elements and Association with Selective Medical, Social, Demographic and Environmental Factors
Source: MDPI journal article supplement (doi:10.3390/nu13061885), 2021-05-31
Supplement: s1 [file s1]

**Supplementary Table 2:** Concentrations of trace elements detected in human milk: comparison with range recommended by AAP<sup>1</sup>

| Element                         | Type of milk | AAP-limit range | Interval (95%) |        | Lower range (%) | Upper range (%) | p-value | Element | AAP-limit range | Interval (95%) |        | Lower range (%) | Above range (%) | p-value |  |  |  |  |
|---------------------------------|--------------|-----------------|----------------|--------|-----------------|-----------------|---------|---------|-----------------|----------------|--------|-----------------|-----------------|---------|--|--|--|--|
|                                 |              |                 | Lower          | Upper  |                 |                 |         |         |                 | Lower          | Upper  |                 |                 |         |  |  |  |  |
| Minerals (mg/L)                 |              |                 |                |        |                 |                 |         |         |                 |                |        |                 |                 |         |  |  |  |  |
| Ca                              | TC           | 200-300         | 233.43         | 257.29 | 0               | 60              | <0.001  | Na      | 120–250         | 106.14         | 231.61 | 80              | 0               | <0.001  |  |  |  |  |
|                                 | TI           |                 | 250.92         | 290.27 | 0               | 13              |         |         |                 | 99.05          | 145.68 | 40              | 0               |         |  |  |  |  |
|                                 | TM           |                 | 278.09         | 303.99 | 0               | 15              |         |         |                 | 110.18         | 139.68 | 40              | 0               |         |  |  |  |  |
|                                 | PM           |                 | 280.36         | 310.17 | 0               | 15              |         |         |                 | 124.48         | 138.30 | 50              | 0               |         |  |  |  |  |
| K                               | TC           | 400–550         | 308.14         | 458.78 | 20              | 0               | >0.999  | P       | 120–140         | 130.28         | 139.62 | 0               | 0               | >0.999  |  |  |  |  |
|                                 | TI           |                 | 332.84         | 467.28 | 40              | 0               |         |         |                 | 122.85         | 136.39 | 0               | 0               |         |  |  |  |  |
|                                 | TM           |                 | 405.31         | 462.89 | 20              | 0               |         |         |                 | 121.67         | 135.10 | 10              | 0               |         |  |  |  |  |
|                                 | PM           |                 | 352.92         | 494.38 | 30              | 0               |         |         |                 | 119.10         | 131.51 | 20              | 0               |         |  |  |  |  |
| Mg                              | TC           | 30–35           | 28.19          | 41.62  | 0               | 60              | >0.999  |         |                 |                |        |                 |                 |         |  |  |  |  |
|                                 | TI           |                 | 34.12          | 37.84  | 0               | 40              |         |         |                 |                |        |                 |                 |         |  |  |  |  |
|                                 | TM           |                 | 36.21          | 40.17  | 0               | 20              |         |         |                 |                |        |                 |                 |         |  |  |  |  |
|                                 | PM           |                 | 36.16          | 38.56  | 0               | 30              |         |         |                 |                |        |                 |                 |         |  |  |  |  |
| Essential trace elements (µg/L) |              |                 |                |        |                 |                 |         |         |                 |                |        |                 |                 |         |  |  |  |  |
| Co                              | TC           | 0–0.14          | 0.049          | 0.065  | 0               | 0               | >0.999  | Mn      | 1–3             | 1.67           | 3.54   | 0               | 0               | >0.999  |  |  |  |  |
|                                 | TI           |                 | 0.037          | 0.067  | 0               | 0               |         |         |                 | 1.56           | 1.93   | 10              | 0               |         |  |  |  |  |
|                                 | TM           |                 | 0.039          | 0.050  | 0               | 0               |         |         |                 | 1.44           | 1.92   | 0               | 0               |         |  |  |  |  |
|                                 | PM           |                 | 0.049          | 0.056  | 0               | 0               |         |         |                 | 1.80           | 2.18   | 0               | 0               |         |  |  |  |  |
| Cu                              | TC           | 200-400         | 211.20         | 289.03 | 0               | 20              | 0.982   | Se      | 10–30           | 9.90           | 11.73  | 50              | 0               | <0.001  |  |  |  |  |
|                                 | TI           |                 | 236.02         | 302.29 | 0               | 10              |         |         |                 | 9.44           | 10.38  | 50              | 0               |         |  |  |  |  |
|                                 | TM           |                 | 290.21         | 389.86 | 0               | 0               |         |         |                 | 8.28           | 9.47   | 60              | 0               |         |  |  |  |  |
|                                 | PM           |                 | 251.03         | 279.63 | 0               | 0               |         |         |                 | 4.22           | 9.72   | 80              | 0               |         |  |  |  |  |

|                             |    |         |        |        |   |    |        |    |            |         |         |    |    |        |
|-----------------------------|----|---------|--------|--------|---|----|--------|----|------------|---------|---------|----|----|--------|
| Fe                          | TC | 300–900 | 162.82 | 211.32 | 0 | 0  | >0.999 | Zn | 1000– 3000 | 762.22  | 1248.20 | 10 | 0  | >0.999 |
|                             | TI |         | 166.09 | 204.46 | 0 | 0  |        |    |            | 797.25  | 1285.57 | 10 | 0  |        |
|                             | TM |         | 157.97 | 198.96 | 0 | 0  |        |    |            | 1004.30 | 1471.22 | 10 | 0  |        |
|                             | PM |         | 119.71 | 190.15 | 0 | 0  |        |    |            | 316.06  | 1401.85 | 0  | 0  |        |
| I                           | TC | 40–250  | 94.96  | 122.3  | 0 | 0  | >0.999 |    |            |         |         |    |    |        |
|                             | TI |         | 109.37 | 134.52 | 0 | 0  |        |    |            |         |         |    |    |        |
|                             | TM |         | 106.84 | 149.12 | 0 | 0  |        |    |            |         |         |    |    |        |
|                             | PM |         | 84.57  | 105.79 | 0 | 0  |        |    |            |         |         |    |    |        |
| Toxic trace elements (µg/L) |    |         |        |        |   |    |        |    |            |         |         |    |    |        |
| Cs                          | TC | 0–5     | 2.84   | 8.12   | 0 | 10 | <0.001 | Sr | 30–50      | 40.34   | 50.50   | 0  | 50 | <0.001 |
|                             | TI |         | 3.01   | 5.33   | 0 | 10 |        |    |            | 34.33   | 42.03   | 0  | 30 |        |
|                             | TM |         | 2.71   | 3.55   | 0 | 10 |        |    |            | 33.40   | 39.32   | 0  | 0  |        |
|                             | PM |         | 5.17   | 10.17  | 0 | 70 |        |    |            | 42.78   | 55.95   | 0  | 70 |        |

\* Elements in bold and italic indicate the type of human milk statistically significant

Abbreviations: Ca, calcium; Co, cobalt; Cs, cesium; Cu, copper; Fe, iron; I, iodine; K, potassium; Mg, magnesium; Mn, manganese; Na, sodium; P, phosphorus; PM, preterm milk; Se, selenium; Sr, strontium; TC, full-term colostrum; TI, full-term intermediate milk; TM, full-term mature milk; Zn, zinc.

I. American Academy of Pediatrics Committee on Nutrition. Trace elements. In: Pediatric nutrition, 8th, Kleinman RE, Greer FR (Eds), American Academy of Pediatrics, Itasca, IL 2019.
